# Supplementary material for: Cross-sectional and prospective mediating effects of dietary intake on the relationship between sedentary behaviour and body mass index in adolescents
Source: Springer Nature journal article supplement (doi:10.1186/s12889-017-4771-0), 2017-09-29
Supplement: MOESM1 [file 15094920]

## ADDITIONAL FILE 1

Cross-sectional and prospective mediating effects of dietary intake on the relationship between sedentary behaviour and body mass index in adolescents

Elly A. Fletcher<sup>1</sup>, Karen E. Lamb<sup>1</sup>, Sarah A. McNaughton<sup>1</sup>, Sarah P. Garnett<sup>2</sup>, David W. Dunstan<sup>1,3-8</sup>, Louise A. Baur<sup>2</sup>, Jo Salmon<sup>1</sup>

<sup>1</sup>Deakin University, Geelong, Australia, Institute for Physical Activity and Nutrition (IPAN), School of Exercise and Nutrition Sciences. <sup>2</sup>The Children's Hospital at Westmead Clinical School, University of Sydney, Westmead, Australia. <sup>3</sup>Baker IDI Heart and Diabetes Institute, Melbourne, Victoria, Australia. <sup>4</sup>Department of Medicine, Monash University, Melbourne, Australia. <sup>5</sup>The University of Queensland, School of Public Health, Brisbane, Australia. <sup>6</sup>Department of Epidemiology and Preventive Medicine, Monash University, Melbourne, Australia. <sup>7</sup>School of Sport Science, Exercise and Health, The University of Western Australia, Perth Australia. <sup>8</sup>Mary MacKillop Institute for Health Research, Australian Catholic University, Melbourne Australia.

### Corresponding Author

Elly Fletcher, Institute for Physical Activity and Nutrition (IPAN), School of Exercise and Nutrition Sciences, Deakin University, 221 Burwood Highway, Burwood Vic 3125, Australia. Telephone: +61 3 92517262, Email [elly.fletcher@deakin.edu.au](mailto:elly.fletcher@deakin.edu.au)

Table S1: Comparison of baseline characteristics of participants included in the TV viewing and zBMI analyses (n=259) compared to those excluded in the analyses (n=26)

| <b>Variables</b>                     | <b>Included<br/>(n= 259)</b> | <b>Excluded<br/>(n= 26)</b> |
|--------------------------------------|------------------------------|-----------------------------|
| <b>Age, years</b>                    | 12.9 (12.9, 13.0)            | 13.0 (12.9, 13.0)           |
| <b>Sex, %</b>                        |                              |                             |
| Male                                 | 47.5 (41.4, 53.6)            | 56.2 (45.6, 66.3)           |
| Female                               | 52.5 (46.4, 58.4)            | 43.8 (33.7, 54.5)           |
| <b>Maternal education, %</b>         |                              |                             |
| Low                                  | 6.9 (4.4, 10.8)              | 18.6 (11.6, 28.5)*          |
| Medium                               | 65.3 (59.2, 70.8)            | 64.0 (53.1, 73.5)           |
| High                                 | 27.8 (22.7, 33.6)            | 17.4 (10.7, 27.2)           |
| <b>Pubertal status, %</b>            |                              |                             |
| Early puberty                        | 19.3 (8.0, 4.6)              | 0.0 (0.0, 0.0)              |
| Mid-pubertal                         | 35.5 (30.0, 41.6)            | 31.4 (21.5, 43.5)           |
| Late-pubertal                        | 35.5 (30.0, 41.6)            | 44.3 (32.9, 56.3)           |
| Post-pubertal                        | 27.0 (21.9, 32.8)            | 24.3 (15.5, 36.0)           |
| <b>BMI</b>                           |                              |                             |
| kg/m <sup>2</sup>                    | 20.7 (20.2, 21.3)            | 20.8 (19.9, 21.7)           |
| z-score                              | 0.4 (0.3, 0.5)               | 0.4 (0.2, 0.6)              |
| Overweight, %                        | 18.9 (14.6, 24.2)            | 23.9 (56.4, 76.2)           |
| Obese, %                             | 9.2 (6.3, 13.5)              | 9.1 (4.5, 17.3)             |
| <b>Sedentary behaviour</b>           |                              |                             |
| TV viewing (hours/day)               | 3.2 (3.0, 3.4)               | 3.0 (2.7, 3.3)              |
| <b>Dietary intake</b>                |                              |                             |
| Discretionary foods (freq/day)       | 2.4 (2.2, 2.6)               | 2.3 (2.0, 2.7)              |
| Sugar-sweetened beverages (freq/day) | 2.1 (1.8, 2.3)               | 2.0 (1.4, 2.4)              |
| Takeaway food (freq/week)            | 3.4 (3.1, 3.6)               | 3.5 (2.9, 4.1)              |

BMI: Body mass index; zBMI: BMI z-score; TV: television; MVPA: moderate-to-vigorous

physical activity; freq: frequency.

\*Significant  $p < 0.05$ .

Footnote: Maternal education: low = some secondary education or less; medium = completing secondary school, an apprenticeship or technical certificate; high = university or tertiary qualification. Pubertal status self-assessed using the ‘Tanner Stages’ [24]. BMI z-score determined using the age- and sex-specific CDC 2000 reference data [18]. Overweight and obesity determined using the International Obesity Task Force (IOTF) criteria [19].

Table S2: Comparison of baseline characteristics of participants included in the sedentary time and zBMI analyses (n=140) compared to those excluded in the analyses (n=145)

| <b>Variables</b>                      | <b>Included<br/>(n= 140)</b> | <b>Excluded<br/>(n= 145)</b> |
|---------------------------------------|------------------------------|------------------------------|
| <b>Age, years</b>                     | 12.9 (12.9, 13.0)            | 13.0 (12.9, 13.0)*           |
| <b>Sex, %</b>                         |                              |                              |
| Male                                  | 50.0 (41.7, 58.3)            | 49.5 (42.7, 56.3)            |
| Female                                | 50.0 (41.7, 58.3)            | 50.5 (43.7, 57.3)            |
| <b>Maternal education, %</b>          |                              |                              |
| Low                                   | 5.0 (2.3, 10.2)              | 13.2 (9.2, 18.6)*            |
| Medium                                | 62.8 (54.4, 70.5)            | 66.3 (59.5, 72.5)            |
| High                                  | 32.1 (24.8, 40.4)            | 20.5 (15.5, 26.6)            |
| <b>Pubertal status, %</b>             |                              |                              |
| Early puberty                         | 14.3 (35.1, 56.2)            | 1.6 (0.5, 4.8)               |
| Mid-pubertal                          | 41.4 (33.5, 50.0)            | 29.6 (23.5, 36.6)            |
| Late-pubertal                         | 35.0 (27.5, 43.4)            | 39.2 (32.4, 46.4)            |
| Post-pubertal                         | 22.1 (16.0, 30.0)            | 29.6 (23.5, 36.6)            |
| <b>BMI</b>                            |                              |                              |
| kg/m <sup>2</sup>                     | 20.3 (19.7, 21.0)            | 21.0 (20.4, 21.6)            |
| z-score                               | 0.3 (0.1, 0.5)               | 0.5 (0.3, 0.6)               |
| Overweight, %                         | 13.6 (8.8, 20.4)             | 24.6 (19.2, 31.0)*           |
| Obese, %                              | 9.2 (5.4, 15.4)              | 9.2 (5.9, 14.0)              |
| <b>Sedentary behaviour</b>            |                              |                              |
| Total sedentary time (hours/day)      | 6.1 (6.0, 6.2)               | 5.8 (5.3, 6.2)               |
| Average sedentary bouts (minutes/day) | 6.6 (6.5, 6.6)               | 6.6 (6.5, 6.6)               |
| <b>MVPA (minutes/day)</b>             | 48.2 (35.0, 61.4)            | 40.8 (34.2, 47.4)            |
| <b>Dietary intake</b>                 |                              |                              |
| Discretionary foods (freq/day)        | 2.4 (2.1, 2.7)               | 2.3 (2.1, 2.5)               |
| Sugar-sweetened beverages (freq/day)  | 1.9 (1.6, 2.2)               | 2.2 (1.9, 2.4)               |
| Takeaway food (freq/week)             | 3.2 (2.8, 3.6)               | 3.5 (3.1, 3.9)               |

BMI: Body mass index; zBMI: BMI z-score; MVPA: moderate-to-vigorous physical activity;

freq: frequency.

\*Significant  $p < 0.05$ .

Footnote: Maternal education: low = some secondary education or less; medium = completing secondary school, an apprenticeship or technical certificate; high = university or tertiary qualification. Pubertal status self-assessed using the ‘Tanner Stages’ [24]. BMI z-score determined using the age- and sex-specific CDC 2000 reference data [18]. Overweight

and obesity determined using the International Obesity Task Force (IOTF) criteria [19].
